# Supplementary material
Source: Springer Nature journal article supplement (https://www.springermedizin.de/resource/supplementary/12985_2010_1035_MOESM1_ESM.pdf/9608996)

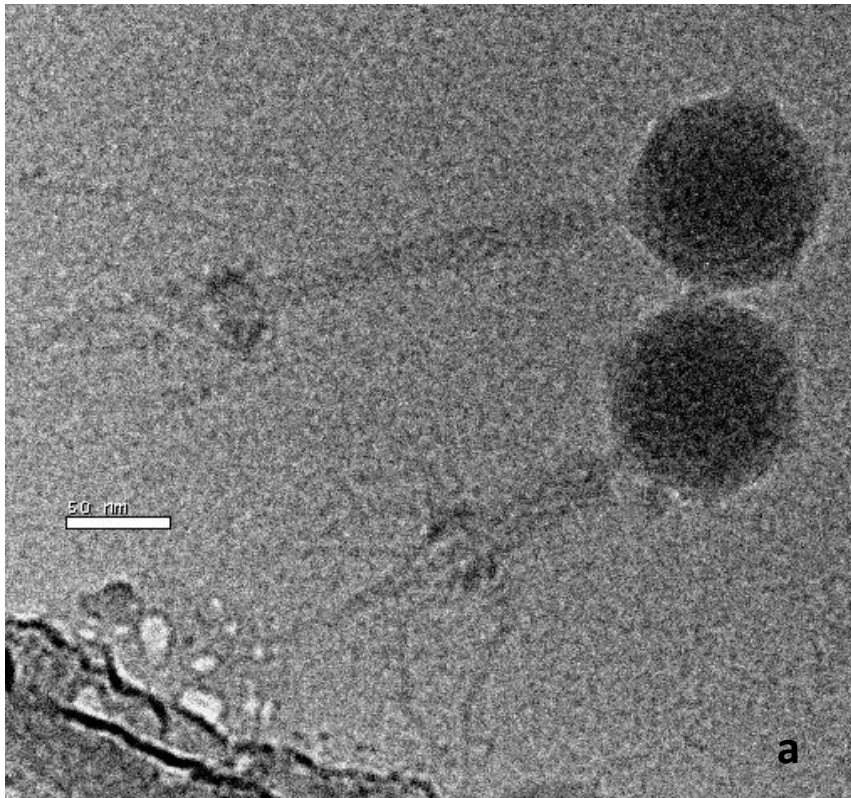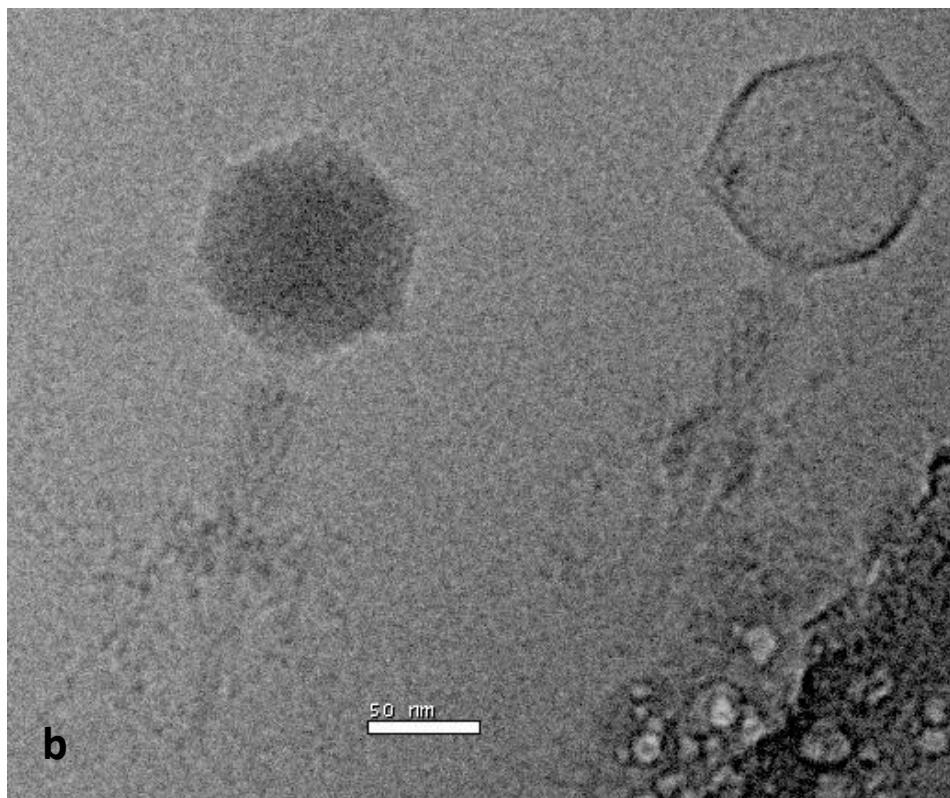

Tail:  $l = 62, 63$  nm,  $w$  (top) =  $28, 27$  nm

Supplement: MOESM1 [file 9608996]
